# Supplementary figures and images for: 3,5-Diethoxy-3′-Hydroxyresveratrol (DEHR) Ameliorates Liver Fibrosis via Caveolin-1 Activation in Hepatic Stellate Cells and in a Mouse Model of Bile Duct Ligation Injury
Source: MDPI journal article supplement (doi:10.3390/molecules23112833), 2018-10-31

A

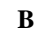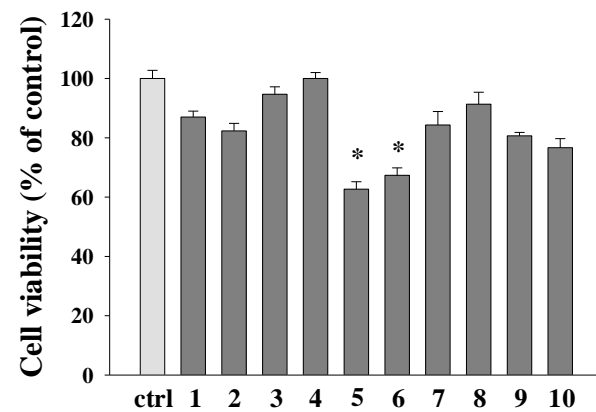

**Figs 2. BDL-induced liver fibrosis.**

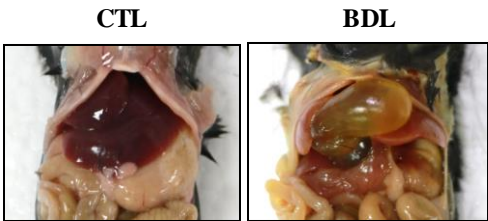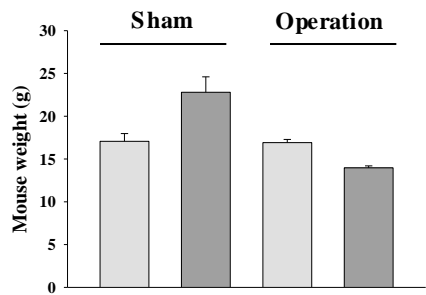

**Spleen**

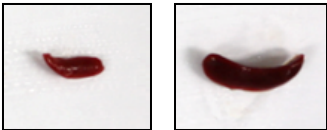

Supplement: s1 [file s1]
